# Supplementary material for: Retinoic acid signaling mediates peripheral cone photoreceptor survival in a mouse model of retina degeneration
Source: eLife. 2022 Mar 22;11:e76389. doi: 10.7554/eLife.76389 (PMC8940176; doi:10.7554/eLife.76389)
Supplement: Supplementary file 1. [file elife-76389-supp1.xlsx]

## Sheet: Genotyping
rd1	Sequence	Notes
rd1_rd1C	CAT GTC CTA CAG CCC CTC TC	rd1 Genotyping Primer. 550bp is mutant, 318bp is WT
rd1_WTR	ACC ATT TGC AAG GAA AGC AC	rd1 Genotyping Primer. 550bp is mutant, 318bp is WT
rd1_pde6brd1R	AAG CTA GCT GCA GTA ACG CCA TTT	rd1 Genotyping Primer. 550bp is mutant, 318bp is WT
Aldh1a1, 2, 3
Aldh1a1(NO)_Flox_Genotype_F1	CAGGATTCCAGCAAACGGTAGGAG	Genotyping for Aldh1a1 Flox Allele
Aldh1a1(NO)_Flox_Genotype_R1	CACTCTTCTCTGATGACTATAGATGGACAG	Genotyping for Aldh1a1 Flox Allele
Aldh1a2(Ki)_Flox_Genotype_1	GTGGGACTCTGCCAGAAGTACTTC	Genotyping for Aldh1a2 Flox Allele
Aldh1a2(Ki)_Flox_Genotype_2	GTGTTGTGTTCACTCAGTCTC	Genotyping for Aldh1a2 Flox Allele
Aldh1a2(Ki)_Flox_Genotype_3	GGCAGCTGTGGAGAACATTTTATATCCATGTTG	Genotyping for Aldh1a2 Flox Allele
Aldh1a3(HF9)_Flox_Genotype_1	AAACCAGCACCACCTCCATA	Genotyping for Aldh1a3 Flox Allele
Aldh1a3(HF9)_Flox_Genotype_2	GTTCTTGCCTCCTAGCTCCA	Genotyping for Aldh1a3 Flox Allele
Aldh1a3(HF9)_Flox_Genotype_3	AAACAACACAGAACCTCCTT	Genotyping for Aldh1a3 Flox Allele
Aldh1a1(NO)_Flox_Genotype_F2	ACAGGATCAGGCATCAGGAG	Genotyping for Aldh1a1 Flox Allele
Aldh1a1(NO)_Flox_Genotype_R2	GATTCCAGCAAACGGTAGGA	Genotyping for Aldh1a1 Flox Allele
CAG-CreER
CAG_CreER_Genotype_F1	GCT AAC CAT GTT CAT GCC TTC	Genotyping for CAG-CreER Allele
CAG_CreER_Genotype_R1	AGG CAA ATT TTG GTG TAC GG	Genotyping for CAG-CreER Allele
LacZ
Genotype_Primer_LacZ_F	ATC CTC TGC ATG GTC AGG TC	Genotyping Primer for LacZ
Genotype_Primer_LacZ_R	CGT GGC CTG ATT CAT TCC	Genotyping Primer for LacZ
Pdgfra-Cre
Pdgfra-Cre_Genotype_F	TCA GCC TTA AGC TGG GAC AT	Genotyping primer for Pdgfra-Cre mouse
Pdgfra-Cre_Genotype_R	ATG TTT AGC TGG CCC AAA TG	Genotyping primer for Pdgfra-Cre mouse

## Sheet: ddPCR
Human ALDH1A1	Sequence	Notes
Hs_ALDH1A1_F1_ddPCR	TGTGACCCCCAAGTCCTATC	Expected Size - 106bp. Human ALDH1A1 mRNA
Hs_ALDH1A1_R1_ddPCR	CCTGCAAAAGTAGCTACAAAGGA	Expected Size - 106bp. Human ALDH1A1 mRNA
Human TBP
HS_TBP_F1_ddPCR	TCCTAGGGGTTATTTCTGTGC	Expected Size - 90bp. Human TBP mRNA
HS_TBP_R1_ddPCR	TGTACAGCCATTCATTTTCATT	Expected Size - 90bp. Human TBP mRNA
Mouse Rho
Mm_Rho_F1_ddPCR	CACACTCAGCCAATCACAGG	Expected Size - 104bp. Mouse Rho mRNA
Mm_Rho_R1_ddPCR	GGGACTGGCACTGTGTTTCT	Expected Size - 104bp. Mouse Rho mRNA
Mouse Nrl
Mm_Nrl_F1_ddPCR	CCACTACCACAACCCAAACC	Expected Size - 90bp. Mouse Nrl mRNA
Mm_Nrl_R1_ddPCR	ACCATGGCAACTGTGAGACC	Expected Size - 90bp. Mouse Nrl mRNA
Mouse GS (Glul)
Mm_GS_F1_ddPCR	GCCAGCAGACTGTTACTTTCC	Expected Size - 110bp. Mouse GS mRNA
Mm_GS_R1_ddPCR	CCAGAAAACTGAAGGGCAAC	Expected Size - 110bp. Mouse GS mRNA
Mouse Arr3
Mm_Arr3_F1_ddPCR	CCAGTGATGTTGGTGTGGAG	Expecte Size - 96bp. Mouse Arr3 mRNA
Mm_Arr3_R1_ddPCR	TGACTATGTCCTCCGAGCTG	Expecte Size - 96bp. Mouse Arr3 mRNA
Mouse Gapdh
Mm_Gapdh_F2_ddPCR	GGCATTGCTCTCAATGACAA	Expected Size - 95bp. Mouse Gapdh mRNA
Mm_Gapdh_R2_ddPCR	ATGTAGGCCATGAGGTCCAC	Expected Size - 95bp. Mouse Gapdh mRNA
Mouse Aldh1a1
Mm_Aldh1a1_ddPCR_F1	TCATCAAGGCCAATGTTGTG	ddPCR Primers for Mouse Aldh1a1
Mm_Aldh1a1_ddPCR_R1	GCTCGCTCAACACTCCTTTT	ddPCR Primers for Mouse Aldh1a1

## Sheet: Aldh1a1 SABER
Well Position	Name	Sequence
A1	Aldh1a1_33_1	TCTGTCTCTGCTGTGAGATAGTTCCAGTTTCTTAGGACATTTTCCTTCTATT
A2	Aldh1a1_33_2	CCCTCAGCTTGTCTTCCAGGCCTGGATGTTCTTTTTTTCCTTCTATT
A3	Aldh1a1_33_3	CAGCACCAGACTCCTCCCCACACAGTTCTATCCACTTTCCTTCTATT
A4	Aldh1a1_33_4	CTCTGTCCCTCTTTCCTGCTTCTGAATTCACCAGTTTTCCTTCTATT
A5	Aldh1a1_33_5	GGGGCATTTCCCAGCTTTATTCTGGTTGTAAAATCCATTTCCTTCTATT
A6	Aldh1a1_33_6	GAGAGTGTTTGAGCTCCTGAAGACCACGTGGAGTTTTTCCTTCTATT
A7	Aldh1a1_33_7	CGGTGATTTGTCAATTTCACATTCGTTTTGGAGACTTCCTTTTTCCTTCTATT
A8	Aldh1a1_33_8	CACGATTTGTCCTCAAGTCCTACTAAAGTGTGATAGGCACTTTCCTTCTATT
A9	Aldh1a1_33_9	GCCACTTAGCCAGGATGCTTCTTCCAAGAACAAGATTTCCTTCTATT
A10	Aldh1a1_33_10	GCCTCCTAAATCCGACAAGTATGCATTGGCAAAGATTTCCTTCTATT
A11	Aldh1a1_33_11	GCCCAGCCTGCACAGTACTTTAATGCTTTTATGCATTTCCTTCTATT
A12	Aldh1a1_33_12	GGCCTATCTTCCAAATGAACATGAGCATTGGAAAATTCCACTTTCCTTCTATT
B1	Aldh1a1_33_13	CTTGACAACCACGGTATTCCCACAGCTAAGGGCAGTTTCCTTCTATT
B2	Aldh1a1_33_14	ACAACATTGGCCTTGATGATAAAACACTCCATGGTGTGTTTCCTTCTATT
B3	Aldh1a1_33_15	TCGCTCAACACTCCTTTTCACAAACTCATCATAAACTGACTTTTCCTTCTATT
B4	Aldh1a1_33_16	CCTTGATTTATTCCTGGGGTCAGAGGATTTCCAAGAACATTTTCCTTCTATT
B5	Aldh1a1_33_17	GGCTCCTTCTTTCTTCCCACTCTCAATGAGATCGAGTATTTTTTCCTTCTATT
B6	Aldh1a1_33_18	ACACTGTGGGCTGCACAAAGAAGCCTTTGTTCCCCTTTCCTTCTATT
B7	Aldh1a1_33_19	GCTGGCTTCTTTAGGAGTTCTTCTGAGATATCTTCATTGCGTTTCCTTCTATT
B8	Aldh1a1_33_20	GGAGATGTGTAGCCACTGCTGAGAGTTTCTCTTTACTCTTTTCCTTCTATT
B9	Aldh1a1_33_21	GACGGAGTTACAGAGAGCTTGCGCTTATATCTATCCTTCTATTTCCTTCTATT
B10	Aldh1a1_33_22	AGCTTAAGTCACAACTAGTCCTCCTCACCAAATGAGTATGTTTTCCTTCTATT
B11	Aldh1a1_33_23	TGTGGTGAGTACTTCAAGGAGTCACTGAGGGACAGTTTCCTTCTATT
B12	Aldh1a1_33_24	TGGGGAACAGAGCAGCTGACTCTGCAGTCATTATGTTTCCTTCTATT
C1	Aldh1a1_33_25	GCTAGGCATTTCATTTGACAAGCAGGCATGACATTCTAGAATTTCCTTCTATT
C2	Aldh1a1_33_26	CATGCAAGGGTGCCTTTATTAAGCTTTGCGTTCTAATTACATTTCCTTCTATT

## Sheet: Cyp26a1 SABER
Well Position	Name	Sequence
A1	Cyp26a1_1	GGCTGCTCACACAGTACAGGTCCCAGAGCTTGAGCTTTCATCATCAT
A2	Cyp26a1_2	GTTTCCCCAAAGAATGGGAAGCCCATGGTACCGGGTTTCATCATCAT
A3	Cyp26a1_3	ATGAAGCCGTATTTCCTGCGCTTCATCTGCAGAAATTTCATCATCAT
A4	Cyp26a1_4	CTTTCGCTGCTTGTGCGAGGAATCGTGCAGGTTGGTTTCATCATCAT
A5	Cyp26a1_5	CTGACTTCCTCAGCGATCACGGGCACGTAGCACTGTTTCATCATCAT
A6	Cyp26a1_6	AGGGCACGTCAATGGGAAGAGAGAAGAGATTGCGGTTTCATCATCAT
A7	Cyp26a1_7	ATGTTCTCCTCGATGCGCGCGTGTATAAGGTTCCGCTTTCATCATCAT
A8	Cyp26a1_8	GTCGCAGCACTGGCTGTAGTTTCATGACCACCAAATTTCATCATCAT
A9	Cyp26a1_9	GGACATGTGGGTAGAGTCCTAGGTAAGTGATCAGTGACTTTCATCATCAT
A10	Cyp26a1_10	ACACCCAGTGTATTTAAGCTGTTCCAAAGTTTCCATGTCTATTTCATCATCAT
A11	Cyp26a1_11	ACCGGAGGATTCAATCGCAGGGTCTCCTTAATGACTTTCATCATCAT
A12	Cyp26a1_12	CAAAAGTCTTCAGAGCAACCCGAAACCCTCCTGGATTTCATCATCAT
B1	Cyp26a1_13	TGCCACATCGTGGGTGTCACAGATACTGTAAATAACATTTTCATCATCAT
B2	Cyp26a1_14	AAGCGGTCGGGATTAAATTCCTCCTTGTTAGTGAAGATTTTCATCATCAT
B3	Cyp26a1_15	TGAACCGGGAAGCATCCTCTGGATGAGGCACTATATTTCATCATCAT
B4	Cyp26a1_16	ACAGCTCCGAAGGCCTCCTCCAAATGGAATGAAGCTTTCATCATCAT
B5	Cyp26a1_17	ACAGTGCCTAGCCAGCTCCACTGTAAATATCTTAAGAAGAATTTCATCATCAT
B6	Cyp26a1_18	TGTCTTCATTGTAGGAGGTCCATTTAGAAGCTGCCAATCTTTCATCATCAT
B7	Cyp26a1_19	TTGCAGGGAGATTGTCCACAGGGTACACAGTGGGGTTTCATCATCAT

## Sheet: Aqp4 SABER
Well Position	Name	Sequence
A1	Aqp4_28_1	AGTATGACATATAACACAAGAAACAGAACCCAGCCACACTGTTTCAACTTAAC
A2	Aqp4_28_2	TTGTGTTAGTTAAGGTGTGCTGAAAAGTATTGACACCTGGATTTCAACTTAAC
A3	Aqp4_28_3	TCTTTTGTTATAGTCCACTTTCAAGTAGAGGCCATGCTTGCTTTCAACTTAAC
A4	Aqp4_28_4	TCCAAGTTCACGTATCCTGTAGTTTAGTGATTAGAGCGTCTTTTCAACTTAAC
A5	Aqp4_28_5	CATGGCTTTTGTAAGATTGTCTGTTTGGCTCTCTGGCTTTCAACTTAAC
A6	Aqp4_28_6	TTCAATTGTCACAGAGGCAGTGTCTCTGTGAGATTTCTTTTCAACTTAAC
A7	Aqp4_28_7	GATCTATGAGGAAGGTGTCAACATCACACAACAAAGGCCTTTCAACTTAAC
A8	Aqp4_28_8	AGGCAAGGACCAATGCCACCATTTTAATTAGTCCCTTTCAACTTAAC
A9	Aqp4_28_9	TTCATTTTGAGATGTCAGGGTTCTCAGTGGGGTTAGAGTTTCAACTTAAC
A10	Aqp4_28_10	CAGTGCACACATTGCCTGGATTCTCCTAGGAGAAATTTCAACTTAAC
A11	Aqp4_28_11	TGACCTCTAATATATCAGCCCATTTCCCAGAGACTACCAACTTTCAACTTAAC
A12	Aqp4_28_12	TCCTTATGAAATCTTCATCAGGGAGCAGCTGTGGCTTTCAACTTAAC
B1	Aqp4_28_13	CGAGCTGTGGTGGGACACCCCTCTGAAGATCGAACTTTCAACTTAAC
B2	Aqp4_28_14	GGAAGAGGACTCATGATAGTGGCAAATCACAGGAACATTTCAACTTAAC
B3	Aqp4_28_15	TGACAGACTATGTATGTACATTTCCAGTGTATGGACCACCTTTTCAACTTAAC
B4	Aqp4_28_16	TTTTCCTCTCTGATCTCTGTGCGGTGTATCTGTCAGTTTTCAACTTAAC
B5	Aqp4_28_17	AGCTGTCTCTTGGGAACGGCACTATGCACTTCATTTTTCAACTTAAC
B6	Aqp4_28_18	ATGTTGTATAATTTGGTGTCATCCACAAGGCAATAGACCCCTTTCAACTTAAC
B7	Aqp4_28_19	TTTTACTGGCAGAGCCGTGAGTGAAATGCAAGACATTTCAACTTAAC
B8	Aqp4_28_20	TATTGCAAAGACGAAGAGTGTGAAGTAGTCACTCTCTGCCTTTCAACTTAAC
B9	Aqp4_28_21	TGGCACTCTGCCAGCTGCTAGCAAACAAATCACTATTTCAACTTAAC
B10	Aqp4_28_22	TTCAGTTTGTACCATACTGAATGCTGTCACTGGAAATGACTTTTCAACTTAAC
B11	Aqp4_28_23	ATCACAGGCCAGGATTTTGAAAGAGTAATCAGAAATGTGCTTTTCAACTTAAC
B12	Aqp4_28_24	TTTGACCCGACATATTTGTTGATGGTTGATATCACCTTCCGTTTCAACTTAAC
C1	Aqp4_28_28	AACTGAAGCGCTCTGATCTTAAGTCTGCGTGGTATTTTCAACTTAAC
C2	Aqp4_28_26	ATTGTGAAAACATTTGAAAGAATCGGCAGAAACCTCCCCTTTCAACTTAAC
C3	Aqp4_28_27	GGGAGGTCTATGCCCTGGTTCTGCGTGATCTGCTCTTTCAACTTAAC
C4	Aqp4_28_28	AGAGGAAGCTTATGTCTCTGGTGTAGTATATTCAAAGCCCTTTTCAACTTAAC
C5	Aqp4_28_29	CCCATGCTCCCAGCATCTGCCTCAGAACATGACCATTTTCAACTTAAC
C6	Aqp4_28_30	GAGAGGCATATGCTGCCCTCGTGCCTTTCTGGGAATTTCAACTTAAC
C7	Aqp4_28_31	CTCACACATCAGTTTCCTAGCACCGAAGAGAATCAGGTTTCAACTTAAC
C8	Aqp4_28_32	TTTAATAGTGGTCCATTATCTCGCTGCCACAGACACATTTCAACTTAAC
C9	Aqp4_28_33	TGCCATTAACAATAAGAAGTCACACACAGTTGGAATTGTGCTTTCAACTTAAC
C10	Aqp4_28_34	TTGGGAGAAGAAAGCCCTCCATTACCAGCTATTTACAAGTTTCAACTTAAC
C11	Aqp4_28_35	AGTCCTTGAAGAAATGGCTCTTCTCTCTTCCACTACTAACTTTTCAACTTAAC
C12	Aqp4_28_36	TGCTAGACTGTTATGATCATAGAAACTGGGGTTTCCACAGATTTCAACTTAAC
D1	Aqp4_28_37	GCATTCGATGGGCGGAAGGCAAAGCAGTATGGGAGTTTCAACTTAAC
D2	Aqp4_28_38	ACCAAGCAGGAGGTAAATACCTTAAAAGCATGATGGTAAGCTTTCAACTTAAC
D3	Aqp4_28_39	TATGTGCAGATGGGGTAACTAGGAGCTTTGCACAGTTTCAACTTAAC
D4	Aqp4_28_40	AGGCTGTGTGCTCACCCCTTTATTTGGCAACCACGTTTCAACTTAAC
D5	Aqp4_28_41	ATGCATATCGTGGGAATCAAAACAGCATCAGCAGCTTTCAACTTAAC
D6	Aqp4_28_42	TAAGATGGGGCAGGACTGGTTTATACCAGCTAGAGTTTTCAACTTAAC
D7	Aqp4_28_43	AAGCAGGATTTAGACACCAACTAAAAGTCAGGACTCGACTTTCAACTTAAC
D8	Aqp4_28_44	ATTTAGGGATCAAAATGGCAAACAAATTCCCCAGTTTTGCATTTCAACTTAAC
D9	Aqp4_28_45	TAGGTGGTTAATGGTTTGTGGTACATTTAAGAGTGTGCACTTTTCAACTTAAC
D10	Aqp4_28_46	AAAACAGACCAATCATTTGATAACAGAGGTTTCCCTCTCCGTTTCAACTTAAC
D11	Aqp4_28_47	TGTGATGGATGCAAGGCAGTAGCACACCTTGTTCCTTTCAACTTAAC
D12	Aqp4_28_48	CTCAATGGGTGTCCCATGTATAGCTTTCATTTGATGGAACTTTTCAACTTAAC
E1	Aqp4_28_49	TTTTACTTTTAGCCCTATGGGTTCTTGGATTCTGAGGGGTTTCAACTTAAC
E2	Aqp4_28_50	ACAAATGATGTATTAGCAATGGCCCTTGCTAATGTTTTCCCTTTCAACTTAAC
